# Supplementary material
Source: Frontiers journal article supplement (https://www.frontiersin.org/articles/230094)

# Supplementary Figure 1

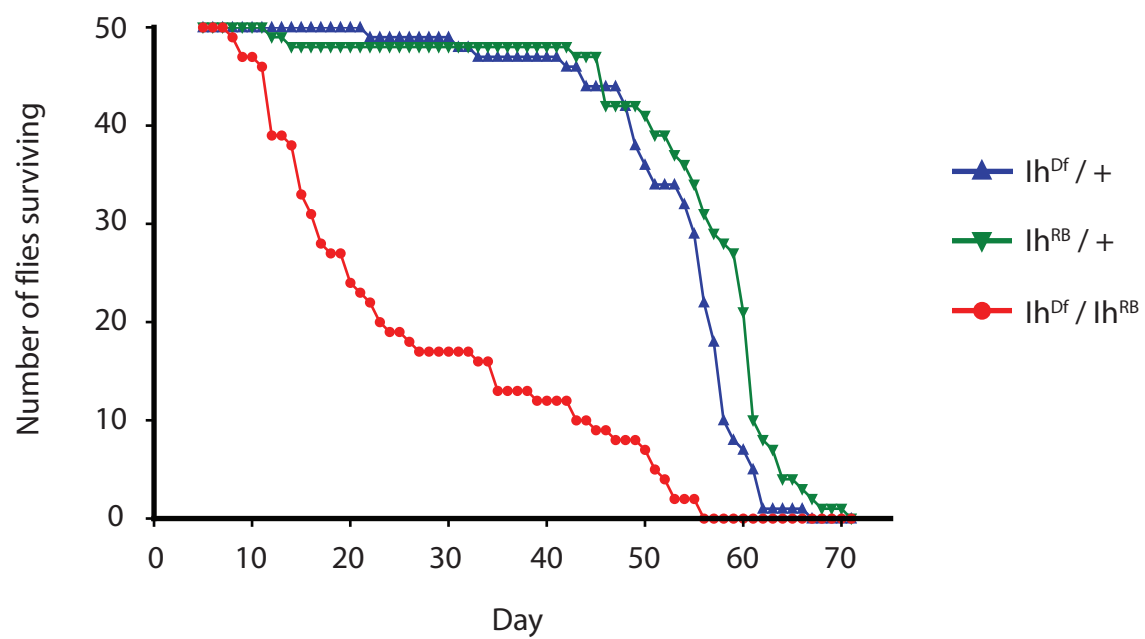

Supplement: Image_1.PDF [file Image_1.PDF]
